RESEARCH ARTICLE

# Molecular and Morphological Species Boundaries in the Gorgonian Octocoral Genus *Pterogorgia* (Octocorallia: Gorgoniidae)

Herman H. Wirshing<sup>1\*</sup>, Andrew C. Baker

Department of Marine Biology and Ecology, Rosenstiel School of Marine and Atmospheric Science, University of Miami, Miami, Florida, United States of America

<sup>2</sup> Current Address: Department of Invertebrate Zoology, National Museum of Natural History, Smithsonian Institution, Washington, DC, United States of America

\* [wirshingh@si.edu](mailto:wirshingh@si.edu)

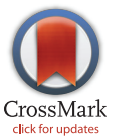

OPEN ACCESS

**Citation:** Wirshing HH, Baker AC (2015) Molecular and Morphological Species Boundaries in the Gorgonian Octocoral Genus *Pterogorgia* (Octocorallia: Gorgoniidae). PLoS ONE 10(7): e0133517. doi:10.1371/journal.pone.0133517

**Editor:** Dorothee Huchon, Tel-Aviv University, ISRAEL

**Received:** April 5, 2015

**Accepted:** June 28, 2015

**Published:** July 21, 2015

**Copyright:** This is an open access article, free of all copyright, and may be freely reproduced, distributed, transmitted, modified, built upon, or otherwise used by anyone for any lawful purpose. The work is made available under the [Creative Commons CC0](https://creativecommons.org/licenses/by/4.0/) public domain dedication.

**Data Availability Statement:** All datasets used for analyses are included as Supporting Information files. All DNA sequences used in this study are available through GenBank (accession numbers KP687635 - KP687732).

**Funding:** This work was supported by the U.S. National Science Foundation OCE-0527184 to ACB and Rowlands and Knight Graduate Fellowships, University of Miami to HHW. The funders had no role in study design, data collection and analysis, decision to publish, or preparation of the manuscript.

## Abstract

Most gorgonian octocoral species are described using diagnostic characteristics of their sclerites (microscopic skeletal components). Species in the genus *Pterogorgia*, however, are separated primarily by differences in their calyx and branch morphology. Specimens of a morphologically unusual *Pterogorgia* collected from Saba Bank in the NE Caribbean Sea were found with calyx morphology similar to *P. citrina* and branch morphology similar to *P. guadalupensis*. In order to test morphological species boundaries, and the validity of calyx and branch morphology as systematic characters, a phylogenetic analysis was undertaken utilizing partial gene fragments of three mitochondrial (*mtMutS*, cytochrome *b*, and *igr4*; 726bp total) and two nuclear (*ITS2*, 166bp; and *SRP54* intron, 143bp) loci. The datasets for nuclear and mitochondrial loci contained few phylogenetically informative sites, and tree topologies did not resolve any of the morphological species as monophyletic groups. Instead, the mitochondrial loci and *SRP54* each recovered two clades but were slightly incongruent, with a few individuals of *P. guadalupensis* represented in both clades with *SRP54*. A concatenated dataset of these loci grouped all *P. anceps* and *P. guadalupensis* in a clade, and *P. citrina* and the *Pterogorgia* sp. from Saba Bank in a sister clade, but with minimal variation/resolution within each clade. However, in common with other octocoral taxa, the limited genetic variation may not have been able to resolve whether branch variation represents intraspecific variation or separate species. Therefore, these results suggest that there are at least two phylogenetic lineages of *Pterogorgia* at the species level, and the atypical *Pterogorgia* sp. may represent an unusual morphotype of *P. citrina*, possibly endemic to Saba Bank. Branch morphology does not appear to be a reliable morphological character to differentiate *Pterogorgia* species (e.g., branches “flat” or “3–4 edges” in *P. guadalupensis* and *P. anceps*, respectively), and a re-evaluation of species-level characters (e.g., sclerites) is needed.

**Competing Interests:** The authors have declared that no competing interests exist.

## Introduction

Gorgonian octocorals comprise an informal grouping of taxonomically diverse marine organisms nested within the octocorallian order Alcyonacea (Cnidaria: Octocorallia). Like all octocorals, they possess polyps with an eight-part symmetry, but also produce a central skeletal axis that can be comprised of different mixtures of proteinaceous material (gorgonin) and/or calcitic material [1], and their colonial growth forms consist of various vertically-branching morphologies. Gorgonian octocorals are abundant in tropical reef environments in the Caribbean/tropical western Atlantic [2–4] and locally abundant in the deep sea [5]. They are ecologically valuable as ecosystem engineers in providing shelter and physical complexity to the reef environment [6] as well as contributing significantly to the reef substrate [7].

Efforts to understand gorgonian octocoral diversity, and their phylogenetic relationships, have been confounded by significant morphological plasticity in their systematic characters, ranging from gross colony/branch structure to sclerite (microscopic skeletal components) morphology [8–17]. Furthermore, the extent to which the environment governs morphological plasticity in gorgonian octocorals, and how strong a role genetic influences play, remains unknown. For example, Prada [18, 19] demonstrated that the differences between shallow (~3m) and deep (~20m) populations of the gorgonian octocoral *Eunicea flexuosa* in sites across the Caribbean were attributable to genetic differences between each lineage, i.e., were the result of local selection, not environmental plasticity. In contrast, in shallow-water *E. flexuosa* in the Florida keys, Kim [20] found discrete morphological differences within back reef, shallow fore-reef, and forereef environments, but no evidence of genetic differentiation among the three reef habitats. Gutierrez-Rodriguez [21] conducted morphological and genetic analyses of the gorgonian octocoral *Pseudopterogorgia elisabethae* from three sites in the Bahamas, Florida Keys and Colombia, and, although genetic differences were found across geographic locations, there was no clear correlation between genetic variation and branch/sclerite morphology. Interacting environmental factors such as water flow, depth and biomechanical constraints [22] were considered to play a significant role in shaping morphological differences.

The gorgonian octocoral genus *Pterogorgia* Ehrenberg, 1834, (Family: Gorgoniidae) consists of three described species, *P. anceps* Pallas, 1766; *P. citrina* Esper, 1792; and *P. guadalupensis* Duchassaing & Michelin, 1846, all endemic to the Caribbean and tropical western Atlantic [7]. Gorgonian octocoral species in the various other genera within the Gorgoniidae are mostly differentiated by morphological differences in sclerite architecture (see [7, 23]). However, sclerites of the three *Pterogorgia* spp. exhibit very similar morphologies, and are not specifically used for defining autapomorphies for each species (Fig 1). Bayer [7] commented “[a]n examination of the spicules [sclerites] of [*P. guadalupensis*] reveals that they are little different from those of *P. anceps* and *P. citrina*” (p. 277). Alternatively, calyx and branch morphology are used to define *Pterogorgia* spp. and can be used to hypothesize evolutionary relationships (Fig 2). Colonies with distinct calyces, each with their own opening, characterize *P. citrina*. Colonies with calyces that do not appear as individual openings, but instead form a common groove, are a synapomorphy in *P. anceps* and *P. guadalupensis*. These two species are distinguished by the shape of their branches in cross section: *P. anceps* contains branches that bear 3 to 4 edges when viewed in cross section, while *P. guadalupensis* consists of branches that are flat in cross section, and usually over 7mm wide.

Colonies of a unique morphotype of *Pterogorgia* (Fig 3) were collected from Saba Bank [24], in the northeastern Caribbean (October, 2007). This morphotype exhibited distinct calyces characteristic of *P. citrina*, but also consisted of large (>7mm) flat branches not found on other *P. citrina* (*sensu stricto*) colonies collected from the same reef environments on Saba Bank. The large flat branches were similar to those of *P. guadalupensis* colonies found in the same area.

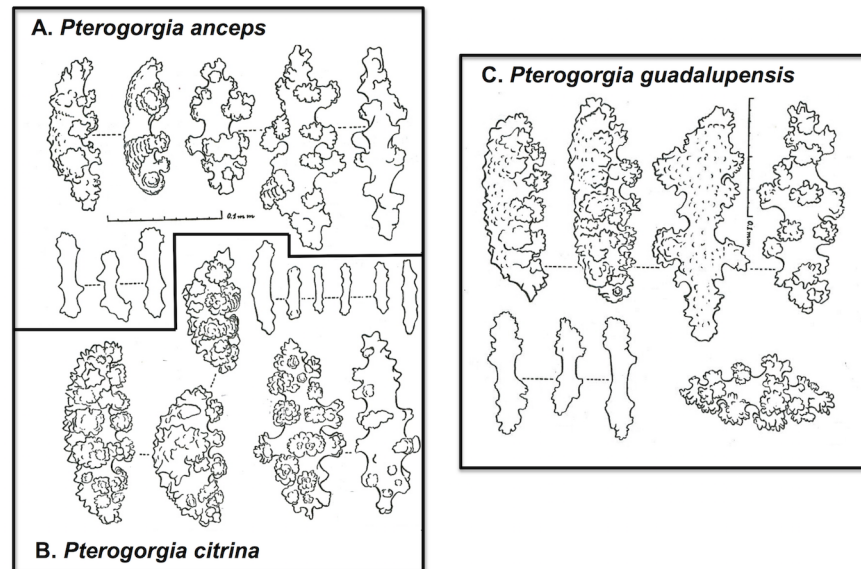

**Fig 1. *Pterogorgia* sclerites.** Drawings depicting the similarity in sclerite form among the three species of *Pterogorgia*, (A) *P. anceps*, (B) *P. citrina*, and (C) *P. guadalupensis*. As a result, and unlike many gorgoniid octocorals, sclerite morphology is not used as a character to separate and define species of *Pterogorgia*. Drawings adapted from [7].

doi:10.1371/journal.pone.0133517.g001

Therefore, a morphological phylogenetic hypothesis places the Saba *Pterogorgia* sp. morphotype as a putative sister species to *P. citrina*, but convergent with *P. guadalupensis* with respect to branch morphology (Fig 2).

Molecular markers for lower-level phylogenetic studies in octocorals have been useful (e.g., [15, 25]), and attempts to utilize mitochondrial loci (e.g., *mtMutS*+*COI*+*igr1*) for molecular barcoding of octocoral species have yielded practical, albeit limited, results [26] despite the relative lack of mitochondrial sequence variation found in anthozoans [27] and the dearth of nuclear markers available for octocorals [28]. Therefore, despite the lack of a clear “barcoding gap” (i.e., maximum intraspecific and minimum interspecific genetic overlap), some octocoral species may be distinguished using mitochondrial genetic distances or nucleotide character-based criteria.

In addition to the mitochondrial loci available, very few nuclear markers have been utilized for species-level diagnoses in gorgonian octocorals. The most common are the ribosomal transcribed spacer (*ITS*) regions, which have been shown to exhibit suitable variation for inter- and intra-generic phylogenetic analyses [29–31]. However, because nuclear ribosomal loci are multi-copy, sequence variants within individuals may confound the phylogenetic signal of this marker. An *SRP54* intron (referred to simply as *SRP54*) is a presumed single copy nuclear marker that has been used for among- and within-species analyses in both octocorals and scleractinian corals [32–34]. Pairwise sequence divergences suggest that *SRP54* may adequately resolve congeneric relationships within these groups. However, significant length variation in intron size across taxa, and the technical difficulty of PCR-amplifying *SRP54* among disparate taxonomic groups, has hindered the assimilation of this marker into comprehensive phylogenetic analyses of octocorals [28].

An accurate assessment of diversity on Saba Bank is crucial for effective conservation policies [35] and the monitoring of the effects of environmental change or disturbance over time [36]. In order to better quantify the evolutionary diversity within *Pterogorgia*, molecular

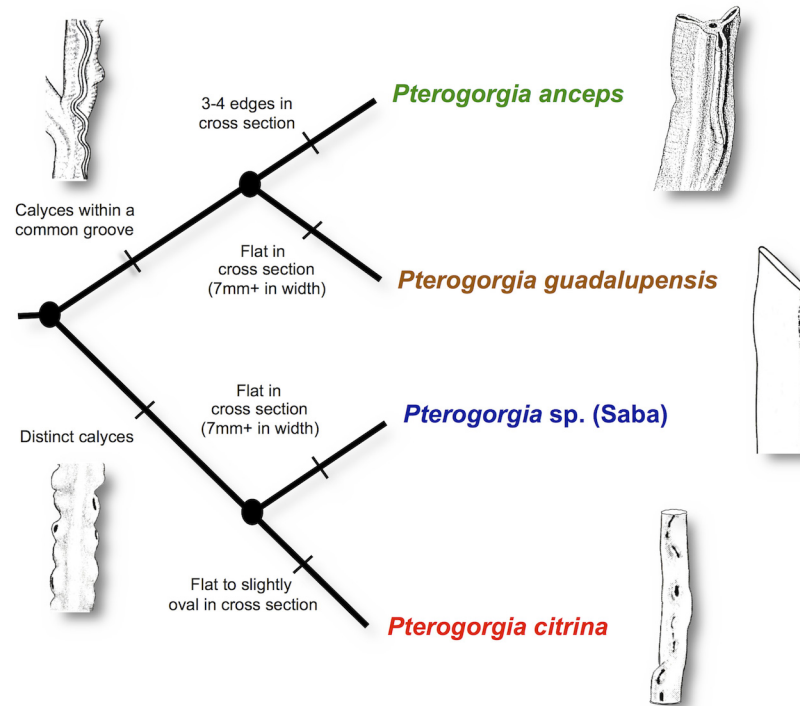

**Fig 2. Cladogram depicting hypothesized phylogenetic relationships among *Pterogorgia* species using morphological characters.** *P. anceps* and *P. guadalupensis* share the synapomorphic character “calyces within a common groove”. Autapomorphic characters, branches “3–4 edges in cross section” define *P. anceps* while branches “flat in cross section (7mm+ in width)” separate *P. guadalupensis*. *P. citrina* and the morphotype from Saba Bank share the synapomorphic character “distinct calyces”. *P. citrina* contains the autapomorphic character of branches “flat to slightly oval in cross section”, while the Saba Bank morphotype contains branches “flat in cross section (7mm+ in width)”. Drawings adapted from [7, 23, 57].

doi:10.1371/journal.pone.0133517.g002

phylogenetic analyses were used to test morphological species hypotheses among individuals of the three described species of *Pterogorgia* and the unusual morphotype from Saba Bank. Partial gene fragments of mitochondrial *mtMutS*, cytochrome *b*, and *igr4*, along with two hyper-variable nuclear loci, *ITS2* and *SRP54*, were used to determine (1) whether calyx and branch morphology are valid systematic characters in *Pterogorgia*, and (2) whether there is genetic evidence for the unusual *Pterogorgia* sp. morphotype from Saba Bank as a new (phylogenetic) species.

## Materials and Methods

### Sample Collection

*Pterogorgia* spp. samples from Saba Bank (USNM1122721-USNM1122730) were obtained by permission from the Department of Invertebrate Zoology at the Smithsonian National Museum of Natural History, Washington, DC, USA, originally collected as part of a bio diversity assessment of the area (see [24]). Samples collected from southeastern Florida (PCFK1-PCFK6; PAFK1-PAFK5; PAFL6) were deposited into the permanent collection of the Coral Reef Conservation Research Laboratory, University of Miami, USA (Table 1). Collection permits were issued by the National Park Service (Biscayne National Park) and the Florida Fish and Wildlife Conservation Commission. Sub-samples of three individuals of *Pterogorgia citrina*, four individuals of *P. guadalupensis*, one individual of *P. cf. anceps*, and two individuals



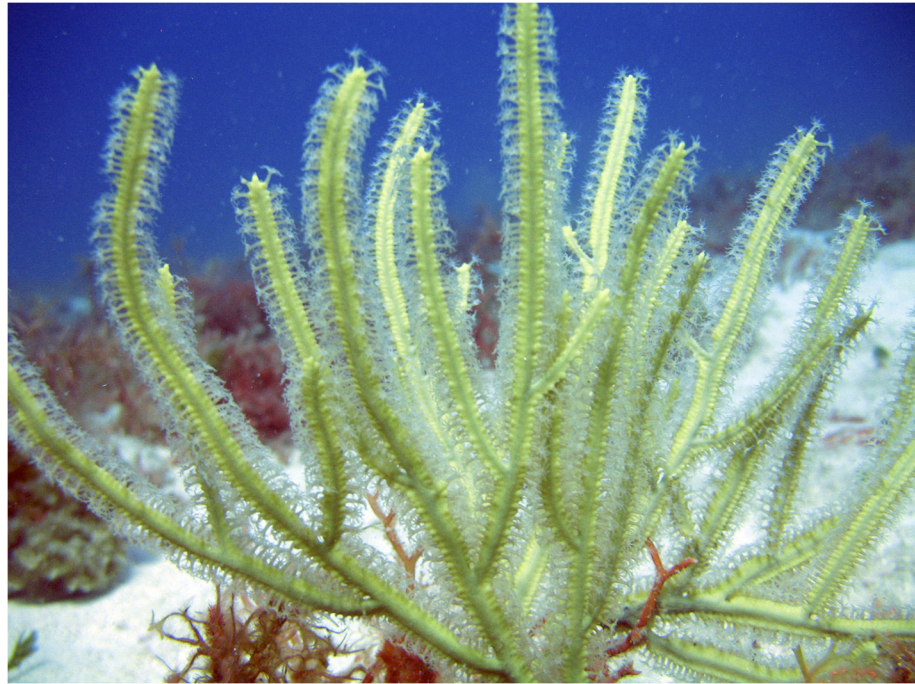

**Fig 3. A unique morphotype of *Pterogorgia* from Saba Bank.** This morphotype is similar to *P. citrina* by containing distinct calyces, but approaches *P. guadalupensis* in branch shape with flat branches over 7mm in width. Photo by J.A. Sanchez.

doi:10.1371/journal.pone.0133517.g003

of a putative new morphospecies of *Pterogorgia*, were used from Saba Bank. In order to incorporate variation within each species across its geographic range, six individuals of *P. citrina* and *P. anceps* were used from reefs in south eastern Florida. Samples of *P. guadalupensis* were only available for analysis from Saba Bank. In total, nine individuals of *P. citrina*, seven of *P. anceps*, five of *P. guadalupensis*, and two of a putative new morphospecies of *Pterogorgia* were utilized for phylogenetic analysis (Table 1). All samples were collected using SCUBA or by free-diving. Branch tips of ~3cm were cut from all colonies and stored in 10mL vials of 95% ethanol.

### Molecular Analyses—DNA Extraction, PCR, Cloning and Sequencing

Total genomic DNA was extracted from each sample using a modified organic protocol [37]. Final elution was in 100 $\mu$ L of TE buffer and samples were stored temporarily at -20°C and permanently at -80°C. The Polymerase Chain Reaction (PCR) was used to amplify two nuclear loci (the internal transcribed spacer 2 [*ITS2*] region of ribosomal DNA, and the signal recognition particle 54 [*SRP54*] intron), and partial gene regions of three mitochondrial loci (*mtMutS*; cytochrome *b*; and intergenic region 4 [*igr4*]). Primer (oligonucleotide) sequences for *ITS2*, 5.8S-436: 5'- AGC ATG TCT GTC TGA GTG TTG G -3' and 28S-663: 5'- GGG TAA TCT TGC CTG ATC TGA G -3' [31] amplified a 210bp product (~166bp with primers removed) with partial segments of 5.8S and 28S regions at the 3' and 5' ends, respectively. Primer sequences for *SRP54* intron, SRP54F: 5'- ATG GGT GAY ATY GAA GGA CTG ATW GAT AAA GTC AA -3' and SRP54R: 5'- TTC ATG ATG TTY TGG AAT TGY TCA TAC ATG TC -3' [38] amplified a 206bp product (~143bp with primers removed) with small segments of the exon on either end of the intron. The three mitochondrial loci were amplified with two primer sets. The 5' end of *mtMutS* (~620bp used for analyses) was amplified using ND42599F: 5'-

**Table 1. Sample information including Voucher/Sample ID\*, sample collection locations, and GenBank Accession Numbers.** USNM vouchers were relabeled with an "SB" (Saba Bank) for their sample ID in the text and figures.

| Genus              | Species        | Voucher/Sample ID* | Sample Location                            | GenBank Accession #s |                   |             |              |
|--------------------|----------------|--------------------|--------------------------------------------|----------------------|-------------------|-------------|--------------|
|                    |                |                    |                                            | <i>mtMutS</i>        | <i>COI + igr4</i> | <i>ITS2</i> | <i>SRP54</i> |
| <i>Pterogorgia</i> | <i>citrina</i> | PCFK1              | East Washerwoman Shoal, Florida Keys       | KP687619             | KP713966          | KP687649    | KP687704     |
|                    |                |                    |                                            |                      |                   | KP687650    | KP687705     |
| <i>Pterogorgia</i> | <i>citrina</i> | PCFK2              | East Washerwoman Shoal, Florida Keys       | KP687620             | KP713967          | KP687651    | KP687706     |
|                    |                |                    |                                            |                      |                   | KP687652    | KP687707     |
| <i>Pterogorgia</i> | <i>citrina</i> | PCFK3              | East Washerwoman Shoal, Florida Keys       | KP687621             | KP713968          | KP687653    | KP687708     |
| <i>Pterogorgia</i> | <i>citrina</i> | PCFK4              | East Washerwoman Shoal, Florida Keys       | KP687622             | KP713969          | KP687654    | KP687709     |
|                    |                |                    |                                            |                      |                   | KP687655    |              |
|                    |                |                    |                                            |                      |                   | KP687656    |              |
| <i>Pterogorgia</i> | <i>citrina</i> | PCFK5              | East Washerwoman Shoal, Florida Keys       | KP687623             | KP713970          | KP687657    | KP687710     |
|                    |                |                    |                                            |                      |                   | KP687658    |              |
|                    |                |                    |                                            |                      |                   | KP687659    |              |
|                    |                |                    |                                            |                      |                   | KP687660    |              |
| <i>Pterogorgia</i> | <i>citrina</i> | PCFK6              | East Washerwoman Shoal, Florida Keys       | KP687624             | KP713971          | KP687661    | KP687711     |
|                    |                |                    |                                            |                      |                   | KP687662    |              |
|                    |                |                    |                                            |                      |                   | KP687663    |              |
| <i>Pterogorgia</i> | <i>citrina</i> | USNM1122722, SB722 | Saba Bank                                  | KP687625             | KP713972          | KP687664    | KP687712     |
|                    |                |                    |                                            |                      |                   | KP687665    |              |
|                    |                |                    |                                            |                      |                   | KP687666    |              |
| <i>Pterogorgia</i> | <i>citrina</i> | USNM1122723, SB723 | Saba Bank                                  | KP687626             | KP713973          | KP687667    | KP687713     |
|                    |                |                    |                                            |                      |                   |             | KP687714     |
|                    |                |                    |                                            |                      |                   |             | KP687715     |
| <i>Pterogorgia</i> | <i>citrina</i> | USNM1122724, SB724 | Saba Bank                                  | KP687627             | KP713974          | KP687668    | KP687716     |
|                    |                |                    |                                            |                      |                   | KP687669    |              |
| <i>Pterogorgia</i> | sp.            | USNM1122730, SB2   | Saba Bank                                  | KP687634             | KP713981          | KP687686    | KP687730     |
|                    |                |                    |                                            |                      |                   |             | KP687731     |
|                    |                |                    |                                            |                      |                   |             | KP687732     |
| <i>Pterogorgia</i> | sp.            | SB1                | Saba Bank                                  | KP687633             | KP713980          | KP687683    | KP687727     |
|                    |                |                    |                                            |                      |                   |             | KP687728     |
|                    |                |                    |                                            |                      |                   |             | KP687729     |
| <i>Pterogorgia</i> | <i>anceps</i>  | PAFK1              | Key Largo, Florida Keys                    | KP687612             | KP713960          | KP687638    | KP687690     |
|                    |                |                    |                                            |                      |                   |             | KP687691     |
|                    |                |                    |                                            |                      |                   |             | KP687640     |
| <i>Pterogorgia</i> | <i>anceps</i>  | PAFK2              | Key Largo, Florida Keys                    | KP687613             | KP713961          | KP687641    | KP687692     |
|                    |                |                    |                                            |                      |                   |             | KP687693     |
|                    |                |                    |                                            |                      |                   |             | KP687694     |
|                    |                |                    |                                            |                      |                   | KP687695    |              |
| <i>Pterogorgia</i> | <i>anceps</i>  | PAFK3              | Key Largo, Florida Keys                    | KP687614             | KP713962          | KP687642    | KP687696     |
|                    |                |                    |                                            |                      |                   |             | KP687697     |
|                    |                |                    |                                            |                      |                   |             | KP687698     |
|                    |                |                    |                                            |                      |                   | KP687699    |              |
| <i>Pterogorgia</i> | <i>anceps</i>  | PAFK4              | Key Largo, Florida Keys                    | KP687615             | KP713963          | KP687644    | KP687700     |
|                    |                |                    |                                            |                      |                   | KP687645    | KP687701     |
| <i>Pterogorgia</i> | <i>anceps</i>  | PAFK5              | Key Largo, Florida Keys                    | KP687616             | KP713964          | KP687646    | KP687702     |
| <i>Pterogorgia</i> | <i>anceps</i>  | PAFL6              | Long Reef, Florida (Bicayne National Park) | KP687617             | KP713959          | KP687647    | KP687703     |
|                    |                |                    |                                            |                      |                   | KP687648    |              |

(Continued)

Table 1. (Continued)

| Genus              | Species              | Voucher/Sample ID* | Sample Location | GenBank Accession #s |                   |             |              |
|--------------------|----------------------|--------------------|-----------------|----------------------|-------------------|-------------|--------------|
|                    |                      |                    |                 | <i>mtMutS</i>        | <i>COI + igr4</i> | <i>ITS2</i> | <i>SRP54</i> |
| <i>Pterogorgia</i> | <i>cf. anceps</i>    | USNM1122721, SB721 | Saba Bank       | KP687618             | KP713965          | KP687635    | KP687687     |
|                    |                      |                    |                 |                      |                   | KP687636    | KP687688     |
|                    |                      |                    |                 |                      |                   | KP687637    | KP687689     |
| <i>Pterogorgia</i> | <i>guadalupensis</i> | USNM1122725, SB725 | Saba Bank       | KP687628             | KP713975          | KP687670    | KP687717     |
|                    |                      |                    |                 |                      |                   | KP687671    | KP687718     |
| <i>Pterogorgia</i> | <i>guadalupensis</i> | USNM1122726, SB726 | Saba Bank       | KP687629             | KP713976          | KP687672    | KP687719     |
| <i>Pterogorgia</i> | <i>guadalupensis</i> | USNM1122727, SB727 | Saba Bank       | KP687630             | KP713977          | KP687673    | KP687720     |
|                    |                      |                    |                 |                      |                   | KP687674    | KP687721     |
|                    |                      |                    |                 |                      |                   | KP687675    | KP687722     |
| <i>Pterogorgia</i> | <i>guadalupensis</i> | USNM1122728, SB728 | Saba Bank       | KP687631             | KP713978          | KP687676    | KP687723     |
|                    |                      |                    |                 |                      |                   | KP687677    | KP687724     |
|                    |                      |                    |                 |                      |                   | KP687678    | KP687725     |
| <i>Pterogorgia</i> | <i>guadalupensis</i> | USNM1122729, SB729 | Saba Bank       | KP687632             | KP713979          | KP687680    | KP687726     |
|                    |                      |                    |                 |                      |                   | KP687681    |              |
|                    |                      |                    |                 |                      |                   | KP687682    |              |

\* Repository Information: USNM samples deposited in the Smithsonian National Museum of Natural History, Washington, DC, USA; PCFK, PAFK, SB1 samples deposited in the Coral Reef Conservation Research Laboratory, University of Miami, USA.

doi:10.1371/journal.pone.0133517.t001

GCC ATT ATG GTT AAC TAT TAC -3' and Mut3458R: 5'- TSG AGC AAA AGC CAC TCC -3' [39–40]. CytbBam1279-F: 5'- AGG AGC CAA TCC AGT AGA GGA ACC -3' and ND6Bam1648-R: 5'- TAY AGG TAA GAA ATG CGA GTG ATC -3' [41] amplified a 130bp product of the 3' end of cytochrome *b* (~66bp used for analyses), the entire *igr4* region (40bp), and ~257bp of the 5' end of *ND6*. Of the ~257bp of *ND6*, only one site was variable among all of the *Pterogorgia* spp. samples. Therefore, this gene region was not used for phylogenetic analyses.

PCR-amplifications used 10pmol of each primer, 200µM dNTPS, 2mM MgCl<sub>2</sub>, and 1µL of genomic DNA (varying final elution concentrations) using 0.6U of Taq polymerase (GoTaq, Promega, Inc.) and manufacturer provided buffers. Sterile DNA-grade water (VWR, Inc.) was added to make a final reaction volume of 25µL. Thermal cycler reaction parameters included an initial denaturing step of 94°C for 3 min, followed by 35 rounds of 94°C for 1 min, an annealing temperature of 55°C for *mtMutS*, cytochrome *b/igr4* and *ITS2*, or 45°C *SRP54* for 1 min, and extension at 74°C for 1 min. A final extension step of 72°C for 7 min completed the reaction. PCR products for the nuclear loci, *ITS2* and *SRP54*, were cloned using pGEM-T Easy Vector Systems (Promega, Inc.) following manufacturer protocols. Successfully transformed and cloned bacterial colonies were used as template DNA for PCR by picking the plated bacterial colony with a pipette tip and inserting it into a PCR-ready reaction. M13F 5'-TGT AAA ACG ACG GCC AGT-3') and M13R 5'-CAG GAA ACA GCT ATG ACC-3'), which flanked the insertion region of the vector, were used to amplify the cloned inserts. Eight clones for each locus (*ITS2* and *SRP54*) were sequenced for each individual. Duplicate clones found for each individual were discarded in later analyses. PCR products for *mtMutS* and cytochrome *b/igr4* were directly sequenced. Sequencing was performed using an ABI 3130xl automated DNA sequencer. Sequence contigs were collated and edited using Geneious Pro 4.8.5 [42].

## Phylogenetic Analyses

Nuclear and mitochondrial loci were analyzed both separately and jointly (as a concatenated data set). Phylogenetic relationships for each nuclear locus, *ITS2* and *SRP54*, were first examined using separate data sets for each marker. One contained all unique sequence clones found for each individual (therefore, one individual could contain more than one sequence in a tree). The other contained a single consensus sequence for each individual. Consensus sequences were created by reducing variable positions found among clones to ambiguity codes for each individual. This allowed for concatenation with the sequences of the mitochondrial loci, which were not cloned. Because the *ITS2* clones contained intra-individual variation that matched interspecific variation, and, thus, contained minimal phylogenetic information, they were excluded from the concatenation of all loci. In total, phylogenetic reconstruction was performed on six data sets (S1 Fig): *ITS2* – (1) unique clones and (2) consensus alignments; *SRP54* – (3) unique clones and (4) consensus alignments; (5) Mitochondrial concatenation of *mtMutS*, cytochrome *b*, *igr4*; and (6) concatenation of all loci excluding *ITS2*. Edited sequences were aligned using MUSCLE (Multiple Sequence Comparison by Log-Expectation) [43], and trimmed to nearest variable position in the alignment on either side. jModelTest 0.1.1 [44–45], using Akaike Information Criterion (AIC) was used to determine the best model of nucleotide sequence evolution for each locus: *ITS2* (unique clones alignment—K80+G, shape = 0.2910; consensus alignment—K80+I, pinv = 0.9850), *SRP54* (unique clones alignment—GTR+I, pinv = 0.7610; consensus alignment—HKY), *mtMutS* (HKY+I+G, shape = 0.0210, pinvar = 0.9200), cytochrome *b* (HKY+I+G, shape = 0.0230, pinvar = 0.9090), *igr4* (HKY+I, pinvar = 0.9620).

Bayesian Inference (BI) was performed using MrBayes 3.1.2 [46], Maximum Parsimony analyses were completed using POY 4.1.2.1 [47], and Maximum Likelihood (ML) analyses were conducted using RAxML v.8 [48]. All Bayesian analyses consisted of two independent runs with four chains, with trees sampled every 100<sup>th</sup> generation. The parameters of the evolutionary models used for each locus were set to match the outputs obtained from jModelTest. For among-site rate variation (+G) and proportion of invariable sites (+I), the options “gamma” and “propinv” were used. When the model required a proportion of the sites as invariable, with the remaining sites drawn from a gamma distribution (+G+I), “invgamma” was used. Concatenated alignments were partitioned into character sets for each locus, and the model of sequence evolution chosen by jModelTest applied to each partition (i.e., locus). All parameters (ratio, statefreq, shape, pinvar) were unlinked to allow each partition to have its own set of parameters, and the overall rate was allowed to differ across partitions by setting the rate prior (prset ratepr) to “variable” for all partitions. Markov chain Monte Carlo (MCMC) runs were carried out for 1 to 5 million generations for all datasets (*ITS2* consensus— 1 million; *ITS2* unique clones— 4 million; mitochondrial concatenation, *SRP54* consensus and unique clones, and total concatenation— 5 million). Convergence for each run was determined when the average standard deviation of split frequencies was <0.01 and the potential scale reduction factor (PSRF) was 1.00. Posterior probabilities were calculated by setting the “burn-in” to 25%, which was sufficient to eliminate trees sampled prior to the runs becoming stationary. MP using POY was applied to all datasets using the Simple Search option with static homology, which utilizes a combination of TBR and SRP branch swapping and random sequence addition with 100 repetitions. Node support was assessed by 1,000 bootstrap replicates for ML and MP. Bremer decay values were calculated using TreeRot v.3 [49].

Three outgroups were used for each dataset (except for *ITS2* alignments, which used two), and consisted of species in different genera within the same family as *Pterogorgia* (Gorgoniidae). *Gorgonia ventalina* and *Pseudopterogorgia acerosa* were used in the mitochondrial and



*SRP54* datasets, and *Pinnigorgia flava* was used in the *ITS2* dataset. A species from a separate family (Plexauridae), *Eunicea flexuosa*, was used in all datasets.

## Results

### Mitochondrial Loci

Initially, the phylogenetic information from each mitochondrial locus, *mtMutS*, cytochrome *b* and *igr4*, was explored individually. Each locus contained minimal sequence variation among the three species of *Pterogorgia* and the morphotype from Saba Bank. The trimmed alignment for *mtMutS* contained 620bp with only 9 variable positions, 7 of which were parsimony-informative. The partial sequence of cytochrome *b* contained 66bp with 1 variable position that was also parsimony-informative. The *igr4* alignment was 40bp in length and also contained 1 variable parsimony-informative site. Initial phylogenetic analyses with each individual mitochondrial locus recovered similar but weakly supported trees. Because of the limited variation among the three mitochondrial loci, a concatenated mitochondrial dataset was used.

Phylogenetic reconstruction using the concatenated mitochondrial dataset recovered a tree with two clades that were well-supported with ML and MP analyses, but were deficient with Bremer support and BI (posterior probabilities 81 and 85) (Fig 4). All of the *P. anceps* and *P. guadalupensis* individuals grouped within a clade, and all of the *P. citrina* and *Pterogorgia* sp. individuals grouped in a sister clade. There was no inter- or intra-specific sequence variation among the individuals grouped within each clade, with the exception of *P. citrina* (SB723). No geographic variation was found among individuals of the same species collected from eastern Florida and Saba Bank.

### Nuclear Loci

***SRP54* intron.** Clones from each individual yielded one to four unique *SRP54* sequences, and their alignment contained 7 parsimony-informative and 17 variable but parsimony-uninformative characters. Phylogenetic reconstruction recovered a tree with two primary clades (Fig 5A). None of the three morphospecies of *Pterogorgia*, nor the Saba morphotype, were resolved monophyletically. However, and unlike with the mitochondrial loci (Fig 4), two *P. guadalupensis* individuals (SB725 and SB727) grouped within a poorly-supported clade that consisted of the *P. citrina* and *Pterogorgia* sp. individuals. The remaining *P. anceps* and *P. guadalupensis* individuals grouped in a well-supported sister clade. None of the *Pterogorgia* spp. clustered by geographic location. *SRP54* consensus sequences (5 parsimony-informative characters) for each individual similarly recovered a phylogeny with two sister clades (Fig 5B). Similar to the unique clones tree for *SRP54* (Fig 5A), one of the clades contained all of the individuals of *P. anceps* and three of the five individuals of *P. guadalupensis*. However, support was low with BI. Unlike the unique clones tree, the clade that grouped the *P. citrina* and *Pterogorgia* sp. individuals together with two individuals of *P. guadalupensis* (SB725 and SB727) was well-supported.

***ITS2*.** Clones from each individual yielded one to four unique *ITS2* sequences, and their alignment contained 5 parsimony-informative and 22 variable but parsimony-uninformative characters. Phylogenetic reconstruction using these sequences recovered a largely unsupported tree with a single clade that contained clones from some *P. anceps* and *P. guadalupensis* individuals (S2A Fig). The remaining sequences of *P. citrina*, *Pterogorgia* sp., and *P. guadalupensis* were unresolved. *ITS2* consensus sequences for each individual (2 parsimony-informative characters in the alignment) recovered a similarly unresolved tree with a single poorly supported clade that grouped clones from most *P. anceps* and *P. guadalupensis* individuals (S2B Fig).

### Mitochondrial and Nuclear Loci

A concatenated dataset containing fragments of the mitochondrial loci *mtMutS*, cytochrome *b*, and *igr4*, and the nuclear locus *SRP54* (14 parsimony-informative and 2 variable but parsimony-uninformative characters) recovered a tree with two well-supported sister clades (BI was relatively low for the *P. citrina*-*Pterogorgia* sp. clade—posterior probability 88) (Fig 6). Similar to the mitochondrial analyses, the *P. anceps* and *P. guadalupensis* individuals grouped together in one clade. However, unlike the other datasets, *P. guadalupensis* was paraphyletic within this clade. A sister clade contained all of the *P. citrina* and *Pterogorgia* sp. individuals. There was no support for the separation of *P. citrina* and the *Pterogorgia* sp. morphotype.

### Discussion

The mitochondrial and nuclear markers used in this study each demonstrated minimal genetic variation at the interspecific level in *Pterogorgia*. For example, among the mitochondrial fragments used, cytochrome *b* and *igr4* each contained only one parsimony-informative site, and *mtMutS* contained seven. However, the fragments used were relatively short in length, which may have led to a limited number of phylogenetically useful sites. Nevertheless, although interspecific variation was minimal and there was no distance-based “barcoding gap” among the *Pterogorgia* morphospecies, there were variable positions and/or indels (indels with *SRP54* only) among each locus which consistently separated *P. citrina* and *Pterogorgia* sp. from *P. anceps* and *P. guadalupensis*, and which could serve as nucleotide character-based “barcodes”

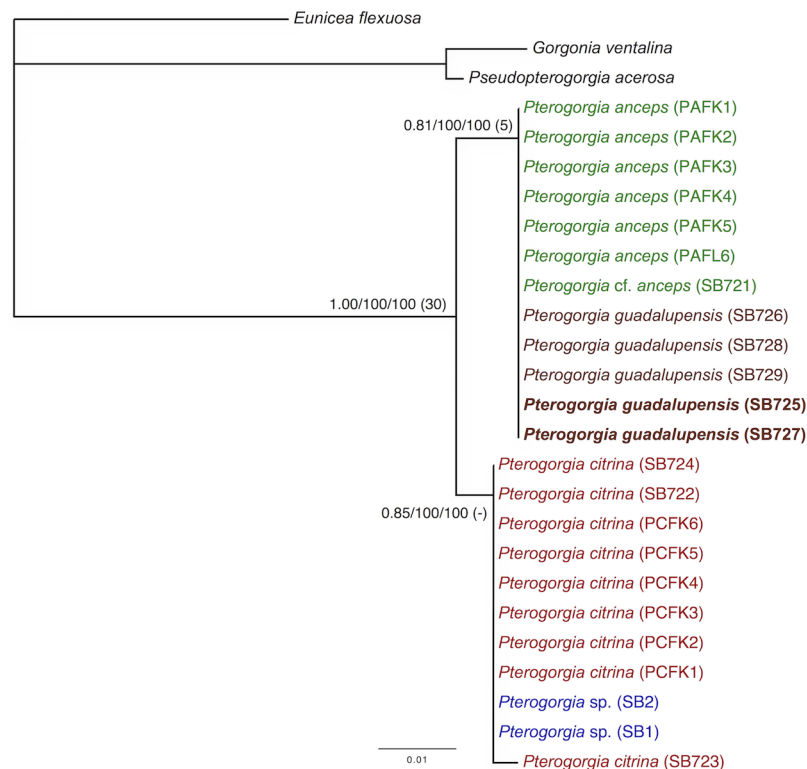

**Fig 4. Mitochondrial phylogeny.** Phylogram generated by a concatenated mitochondrial data set (*mtMutS* + *cytb* + *igr4*) using Bayesian Inference (BI), maximum likelihood (ML), and maximum parsimony (MP). Node support for BI, ML and MP is shown from left to right, with Bremer decay values in parentheses. Taxa in bold are individuals whose placement differed between the mitochondrial and *SRP54* (nuclear) phylogenies (see Fig 5).

doi:10.1371/journal.pone.0133517.g004

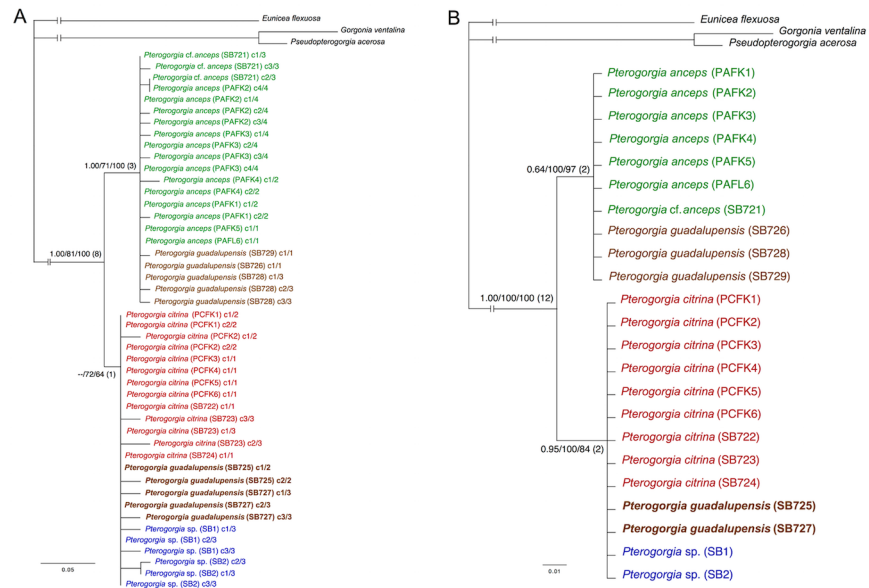

**Fig 5. SRP54 phylogenies.** Phylograms generated from SRP54 sequences for (a) unique clones found for each individual and (b) consensus sequences for each individual using Bayesian Inference (BI), maximum likelihood (ML), and maximum parsimony (MP). Node support for BI, ML and MP is shown from left to right, with Bremer decay values in parentheses. A method with node support <50 contains “—”. In (a) clones are coded by a “c” (clone) followed by the number of the clone relative to the total unique clones found for that individual, and arranged by taxonomic affinity for clarity. Taxa in bold are individuals whose placement differed between the SRP54 (nuclear) and mitochondrial phylogenies (see Fig 4).

doi:10.1371/journal.pone.0133517.g005

[26]. However, these “barcodes” would not be able to differentiate between the morphospecies *P. anceps* and *P. guadalupensis* or *P. citrina* and the morphotype from Saba.

Although the nuclear loci (*ITS2* and *SRP54*) contained more overall variation, much of it was uninformative and consisted of intra-individual and/or unshared single nucleotide differences that may have been artificially generated by cloning [50–51]. These uninformative sites may have contributed to the lower node support observed in the *P. citrina*—*Pterogorgia* sp.—*P. guadalupensis* clade of the *SRP54* unique clones phylogeny (Fig 5A). When these substitutions are accounted for, *SRP54* did not contain any more interspecific variation than the mitochondrial loci. Therefore, although it is considered hyper-variable, *SRP54* may not be useful as a reliable species-level marker among other gorgonian octocoral taxa. With *ITS2*, although it has been useful as a species-level marker in other gorgonian taxa (see Introduction), with *Pterogorgia* it was less informative than the mitochondrial loci at the interspecific level, and was not able to recover a supported phylogeny. Consequently, these data fundamentally consist of two loci, one mitochondrial (the combined *mtMutS*+cytochrome *b+igr4*) and one nuclear (*SRP54*).

*SRP54* is considered a single copy gene [32], yet three to four unique sequences were recovered from clones from individuals of each *Pterogorgia* species, indicating that there may be multiple copies of this gene. However, a third or fourth *SRP54* sequence variant was only recovered once among individuals (S1 Table), suggesting that Taq error might explain some of these cloned sequence variants. Sequencing more clones per individual would help determine whether *SRP54* is indeed multi-copy.

The mitochondrial and *SRP54* data generated slightly conflicting phylogenies. The difference was the placement of two of the five *P. guadalupensis* individuals (SB725 and SB727). For example, the mitochondrial loci grouped all of the *P. guadalupensis* and *P. anceps* individuals in a single clade, and all of the *P. citrina* and *Pterogorgia* sp. individuals in a sister clade (Fig 4).

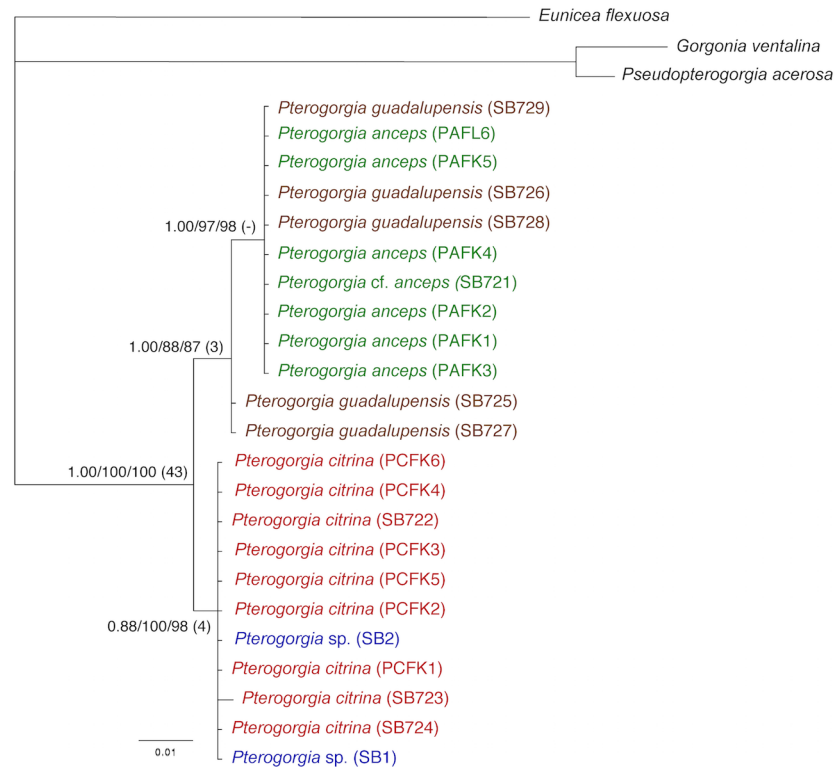

**Fig 6. Concatenated dataset.** Phylogram generated by a concatenated dataset including three mitochondrial fragments (*mtMutS* + *cytb* + *igr4*) and one nuclear (*SRP54*) locus using Bayesian Inference (BI), maximum likelihood (ML), and maximum parsimony (MP). Node support for BI, ML and MP is shown from left to right, with Bremer decay values in parentheses.

doi:10.1371/journal.pone.0133517.g006

However, *SRP54* grouped the *P. guadalupensis* individuals SB725 and SB727 within a sister clade that contained all of the *P. citrina* and *Pterogorgia sp.* individuals (Fig 5B). A concatenated dataset of these markers recovered all of the *P. guadalupensis* individuals in a clade together with the *P. anceps* individuals but in an unresolved subclade (Fig 6). Nevertheless, this result was likely influenced by the relatively longer and more informative mitochondrial dataset, whose loci have been shown to be useful at the interspecific level [26]. Alternatively, the discrepancy between the nuclear and mitochondrial phylogenies may be explained by competing hypotheses based on contrasting evolutionary histories of each marker/incomplete lineage sorting [52] or hybridization/reticulate evolution [53–54]. For example, in the scleractinian coral genus *Acropora*, molecular analyses suggest that hybridization has resulted in several species complexes (or syngameons) [55].

Overall, these data did not support the *Pterogorgia sp.* from Saba Bank as a separate species, or even *P. anceps* and *P. guadalupensis* (two longstanding morphological species that are generally uncontested in the literature [7, 23, 56]) as distinct species. However, two well-supported clades were recovered among the *Pterogorgia* spp. with the mitochondrial and concatenated datasets, suggesting that there are at least two lineages within the genus at the species level. One lineage consists of the morphospecies *P. anceps* and *P. guadalupensis*, and the other contains *Pterogorgia sp.* and *P. citrina*. This phylogenetic arrangement is in general agreement with what is hypothesized based on morphology, albeit less resolved (see Fig 2). It confirms the morphological relatedness of *P. anceps* and *P. guadalupensis*, but cannot differentiate among them. For example, the character “calyces within a common groove” is supported as a

synapomorphy of the *P. anceps*—*P. guadalupensis* clade. However, the separation of the two morphospecies based on branch morphology (e.g., branches “flat” or “3–4 edges” in cross section) was not supported despite conspicuous differences between them. Bayer [23], after examining material collected from the Gulf of Mexico, commented that *P. guadalupensis* “is perfectly distinct and worthy of recognition. I have been unable to find specimens of *P. anceps* that grade into it”. Since then, however, unusual specimens of *P. anceps* have been collected from Panama and the Bahamas with aberrant morphologies (Juan Sanchez, per. comm.). In addition, the specimen of *Pterogorgia* cf. *anceps* (SB721) collected from Saba Bank appeared most like *P. anceps*, but had branches whose morphology approached that of *P. guadalupensis*.

Similarly, the morphological character “distinct calyces” was supported as a synapomorphy of the *P. citrina*—*Pterogorgia* sp. clade. However, branch morphology among *P. citrina* and *Pterogorgia* sp. (e.g., “oval” or “flat”) was not supported as a species-level character. Therefore, the large (>7mm) flat branches of the novel *Pterogorgia* sp. may represent an unusual morphological type of *P. citrina*, possibly unique to Saba Bank, within a larger genetic lineage of *P. citrina* that encompasses various branch morphologies. In this case, the branch morphology of the novel *Pterogorgia* sp. is convergent with those of *P. guadalupensis*.

Together, these results suggest that, in common with other octocoral taxa [26, 28], the variation exhibited by these molecular markers may not be sufficient to distinguish morphospecies within each of the phylogenetic clades recovered. Despite this, it is clear that branch morphology may not be reliable for differentiating *Pterogorgia* species. Morphological differences observed in branch morphology among members of the two recovered lineages may instead represent intraspecific colony variation. A reanalysis of sclerite morphology among the morphotypes that fall within each of the two genetic lineages of *Pterogorgia* is required in order to more accurately delineate *Pterogorgia* species, and, ultimately, reevaluate the taxonomy of the genus. This, together with more robust geographic sampling and the incorporation of additional nuclear and/or population-level markers, will help to further illuminate the molecular and morphological divide within *Pterogorgia*.

## Supporting Information

**S1 Fig. Datasets.** Alignments (in Nexus format) used for phylogenetic analyses. *ITS2* –(1) unique clones (2) consensus; *SRP54* - (3) unique clones (4) consensus; (5) Mitochondrial loci—*mtMutS*, cytochrome *b*, *igr4*; and (6) concatenation of all loci excluding *ITS2*.  
(PDF)

**S2 Fig. *ITS2* phylogenies.** Phylograms generated from *ITS2* sequences for (a) unique clones found for each individual and (b) consensus sequences for each individual using Bayesian Inference (BI), maximum likelihood (ML), and maximum parsimony (MP). Node support for BI, ML and MP is shown from left to right. A method with node support <50 contains “—”. In (a) clones are coded by a “c” (clone) followed by the number of the clone relative to the total unique clones found for that individual.  
(PDF)

**S1 Table. *SRP54* clones.** The number of clones found for each individual for *SRP54*.  
(PDF)

## Acknowledgments

We would like to thank P. Etnoyer, J. A. Sanchez, S. Gray, X. Serrano, and S. Manley for their assistance in the field, and J. A. Sanchez who kindly allowed the use of the *Pterogorgia* sp. image from Saba.



## Author Contributions

Conceived and designed the experiments: HHW. Performed the experiments: HHW. Analyzed the data: HHW. Contributed reagents/materials/analysis tools: ACB. Wrote the paper: HHW ACB.

## References

1. Bayer FM. Key to the genera of Octocorallia exclusive of Pennatulacea (Coelenterata: Anthozoa), with diagnoses of new taxa. *Proc Biol Soc Wash.* 1981; 94: 902–947.
2. Goldberg WM. The ecology of the coral-octocoral communities off the southeast Florida coast: geomorphology, species composition, and zonation. *Bull Mar Sci.* 1973; 23: 465–488.
3. Lasker HR, Coffroth MA. Octocoral distributions at Carrie Bow Cay, Belize. *Marine ecology progress series. Mar Ecol Prog Ser.* 1983; 13: 21–28.
4. Sanchez J, Diaz J, Zea S. Gorgonian communities in two contrasting environments on oceanic atolls of the southwestern Caribbean. *Bull Mar Sci.* 1997; 61: 453–465.
5. Wareham VE, Edinger E. Distribution of deep-sea corals in the Newfoundland and Labrador region, Northwest Atlantic Ocean. *Bull Mar Sci.* 2007; 81: 289–313.
6. Jaap WC. The ecology of the south Florida coral reefs: A community profile. U.S. Fish Wildl. Ser. FWS/OBS-82/08. 1984. 138pp.
7. Bayer FM. The shallow-water Octocorallia of the West Indian region: a manual for marine biologists. Nijho, The Hague. 1961. 373 p.
8. Sanchez JA, Lasker HR and Taylor DJ. Phylogenetic analyses among octocorals (Cnidaria): mitochondrial and nuclear DNA sequences (lsu-rRNA, 16S and ssu-rRNA, 18S) support two convergent clades of branching gorgonians. *Mol Phylogenet Evol.* 2003; 29: 31–42. PMID: [12967605](#)
9. Sanchez JA, McFadden CS, France SC and Lasker HR. Molecular phylogenetic analyses of shallow-water Caribbean octocorals. *Mar Biol.* 2003; 142: 975–987.
10. Wirshing HH, Messing CG, Douady CJ, Reed J, Stanhope MJ, Shivji MS. Molecular evidence for multiple lineages in the gorgonian family Plexauridae (Anthozoa: Octocorallia). *Mar Biol.* 2005; 147: 497–508.
11. McFadden C, France S, Sánchez J, Alderslade P. A molecular phylogenetic analysis of the Octocorallia (Cnidaria: Anthozoa) based on mitochondrial protein-coding sequences. *Mol Phylogenet Evol.* 2006; 41: 513–527. PMID: [16876445](#)
12. France SC. Genetic analysis of bamboo corals (Cnidaria: Octocorallia: Isididae): Does lack of colony branching distinguish *Lepidisis* from *Keratoisis*? *Bull Mar Sci.* 2007; 81: 323–333.
13. Bilewitch JP, Coates KA, Currie DC, Trapido-Rosenthal HG. Molecular and morphological variation supports monotypy of the octocoral *Briareum Blainville, 1830* (Octocorallia: Alcyonacea) in the Western Atlantic. *Proc Biol Soc Wash.* 2010; 123: 93–112.
14. Bilewitch JP, Ekins M, Hooper J, Degnan SM. Molecular and morphological systematics of the Ellisellidae (Coelenterata: Octocorallia): Parallel evolution in a globally distributed family of octocorals. *Mol Phylogenet Evol.* 2014; 73: 106–118. doi: [10.1016/j.ympev.2014.01.023](#) PMID: [24508698](#)
15. McFadden CS, van Ofwegen LP. Stoloniferous octocorals (Anthozoa, Octocorallia) from South Africa, with descriptions of a new family of Alcyonacea, a new genus of Clavulariidae, and a new species of *Cornularia* (Cornulariidae). *Invertebr Syst.* 2012; 26: 331–356.
16. McFadden CS, van Ofwegen LP. Molecular phylogenetic evidence supports a new family of octocorals and a new genus of Alcyoniidae (Octocorallia, Alcyonacea). *Zookeys.* 2013; 346: 59–83. doi: [10.3897/zookeys.346.6270](#) PMID: [24223488](#)
17. Dueñas LF, Alderslade P, Sánchez JA. Molecular systematics of the deep-sea bamboo corals (Octocorallia: Isididae: Keratoisidinae) from New Zealand with descriptions of two new species of *Keratoisis*. *Mol Phylogenet Evol.* 2014; 74: 15–28. doi: [10.1016/j.ympev.2014.01.031](#) PMID: [24530869](#)
18. Prada C, Schizas N and Yoshioka P (2008) Phenotypic plasticity or speciation? A case from a clonal marine organism. *BMC Evol Biol.* 2008; 8: 47. doi: [10.1186/1471-2148-8-47](#) PMID: [18271961](#)
19. Prada C, Hellberg ME. Long prereproductive selection and divergence by depth in a Caribbean candelabrum coral. *Proc Natl Acad Sci.* 2013; 110: 3961–3966. doi: [10.1073/pnas.1208931110](#) PMID: [23359716](#)
20. Kim E, Lasker H, Coffroth M and Kim K. Morphological and genetic variation across reef habitats in a broadcast-spawning octocoral. *Hydrobiologia.* 2004; 530: 423–432.

21. Gutierrez-Rodriguez C, Barbeitos MS, Sanchez JA and Lasker HR. Phylogeography and morphological variation of the branching octocoral *Pseudopterogorgia elisabethae*. *Mol Phylogenet Evol.* 2009; 50: 1–15. doi: [10.1016/j.ympev.2008.09.019](https://doi.org/10.1016/j.ympev.2008.09.019) PMID: [18940261](https://pubmed.ncbi.nlm.nih.gov/18940261/)
22. Lewis JC, Vonwallis E. The Function of Surface Sclerites in Gorgonians (Coelenterata, Octocorallia). *Biol Bull.* 1991; 181: 275–288.
23. Bayer FM. A revision of the nomenclature of the Gorgoniidae (Coelenterata: Octocorallia), with an illustrated key to the genera. *J Wash Acad Sci.* 1951; 41: 91–102.
24. Etnoyer PJ, Wirshing HH, Sanchez JA. Rapid Assessment of Octocoral Diversity and Habitat on Saba Bank, Netherlands Antilles. *PLoS One.* 2010; 5: e10668. doi: [10.1371/journal.pone.0010668](https://doi.org/10.1371/journal.pone.0010668) PMID: [20502636](https://pubmed.ncbi.nlm.nih.gov/20502636/)
25. Quattrini AM, Etnoyer PJ, Doughty C, English L, Falco R, Remon N et al. A phylogenetic approach to octocoral community structure in the deep Gulf of Mexico. *Deep Sea Res Part II Top Stud Oceanogr.* 2014; 99: 92–102.
26. McFadden CS, Benayahu Y, Pante E, Thoma JN, Nevarez PA, France SC. Limitations of mitochondrial gene barcoding in Octocorallia. *Mol Ecol Res.* 2011; 11: 19–31.
27. Shearer TL, Van Oppen MJH, Romano SL and Worheide G. Slow mitochondrial DNA sequence evolution in the Anthozoa (Cnidaria). *Mol Ecol.* 2002; 11: 2475–2487. PMID: [12453233](https://pubmed.ncbi.nlm.nih.gov/12453233/)
28. McFadden C, Sánchez J and France S. Molecular Phylogenetic Insights into the Evolution of Octocorallia: A Review. *Integr Comp Biol.* 2010; 50: 389–410.
29. Mcfadden CS, Hutchinson MB. Molecular evidence for the hybrid origin of species in the soft coral genus *Alcyonium* (Cnidaria: Anthozoa: Octocorallia). *Mol Ecol.* 2004; 13: 1495–1505. PMID: [15140093](https://pubmed.ncbi.nlm.nih.gov/15140093/)
30. Grajales A, Aguilar C and Sánchez JA. Phylogenetic reconstruction using secondary structures of Internal Transcribed Spacer 2 (ITS2, rDNA): finding the molecular and morphological gap in Caribbean gorgonian corals. *BMC Evol Biol.* 2007; 7: 90. PMID: [17562014](https://pubmed.ncbi.nlm.nih.gov/17562014/)
31. Aguilar C, Sanchez JA. Phylogenetic hypotheses of gorgoniid octocorals according to ITS2 and their predicted RNA secondary structures. *Mol Phylogenet Evol.* 2007; 43: 774–786. PMID: [17254805](https://pubmed.ncbi.nlm.nih.gov/17254805/)
32. Concepcion GT, Crepeau MW, Wagner D, Kahng SE, Toonen RJ. An alternative to ITS, a hypervariable, single-copy nuclear intron in corals, and its use in detecting cryptic species within the octocoral genus *Carijoa*. *Coral Reefs.* 2008; 27: 323–336.
33. Concepcion GT, Kahng SE, Crepeau MW, Franklin EC, Coles SL, Toonen RJ. Resolving natural ranges and marine invasions in a globally distributed octocoral (genus *Carijoa*). *Mar Ecol Prog Ser.* 2010; 401: 113–127.
34. Frade PR, Reyes-Nivia MC, Faria J, Kaandorp JA, Luttkhuizen PC, Bak RPM. Semi-permeable species boundaries in the coral genus *Madracis*: Introgression in a brooding coral system. *Mol Phylogenet Evol.* 2010; 57: 1072–1090. doi: [10.1016/j.ympev.2010.09.010](https://doi.org/10.1016/j.ympev.2010.09.010) PMID: [20863897](https://pubmed.ncbi.nlm.nih.gov/20863897/)
35. Hoetjes PC, Carpenter KE. Saving Saba Bank: Policy Implications of Biodiversity Studies. *PLoS One.* 2010; 5, e10769. doi: [10.1371/journal.pone.0010769](https://doi.org/10.1371/journal.pone.0010769) PMID: [20505823](https://pubmed.ncbi.nlm.nih.gov/20505823/)
36. Hoeksema BW, Van Der Land J, Van Der Meij SET, Van Ofwegen LP, Reijnen BT, van Soest RWM, et al. Unforeseen importance of historical collections as baselines to determine biotic change of coral reefs: the Saba Bank case. *Mar Ecol.* 2011; 32: 135–141.
37. Baker AC. Symbiosis ecology of two Caribbean acroporid corals. *Proc.—8<sup>th</sup> Int. Coral Reef Symp.* 1997;2: 1295–1300.
38. Jarman SN, Ward RD, Elliott NG. Oligonucleotide primers for PCR amplification of coelomate introns. *Mar Biotechnol.* 2002; 4: 347–355. PMID: [14961246](https://pubmed.ncbi.nlm.nih.gov/14961246/)
39. France SC, Hoover LL. Analysis of variation in mitochondrial DNA sequences (ND3, ND4L, MSH) among Octocorallia (= Alcyonaria) (Cnidaria: Anthozoa). *Bull Biol Soc Wash.* 2001; 10: 110–118.
40. France SC, Hoover LL. DNA sequences of the mitochondrial COI gene have low levels of divergence among deep-sea octocorals (Cnidaria: Anthozoa). *Hydrobiologia.* 2002; 471: 149–155.
41. van der Ham JL, Brugler MR and France SC. Exploring the utility of an indel-rich, mitochondrial intergenic region as a molecular barcode for bamboo corals (Octocorallia: Isididae). *Mar Genomics.* 2009; 2: 183–192. doi: [10.1016/j.margen.2009.10.002](https://doi.org/10.1016/j.margen.2009.10.002) PMID: [21798187](https://pubmed.ncbi.nlm.nih.gov/21798187/)
42. Drummond AJ, Ashton B, Cheung M, Heled J, Kearse M, Moir, R, et al. Geneious v4.8.5, 2008. Available from <http://www.geneious.com/>
43. Edgar RC. MUSCLE: multiple sequence alignment with high accuracy and high throughput. *Nucleic Acids Res.* 2004; 32: 1792–1797. PMID: [15034147](https://pubmed.ncbi.nlm.nih.gov/15034147/)
44. Guindon S, Gascuel O. A simple, fast and accurate method to estimate large phylogenies by maximum-likelihood. *Sys Biol.* 2003; 52: 696–704.

45. Posada D. jModelTest: Phylogenetic Model Averaging. *Mol Biol Evol.* 2008; 25: 1253–1256. doi: [10.1093/molbev/msn083](https://doi.org/10.1093/molbev/msn083) PMID: [18397919](https://pubmed.ncbi.nlm.nih.gov/18397919/)
46. Ronquist F, Huelsenbeck JP. MrBayes 3: Bayesian phylogenetic inference under mixed models. *Bioinformatics.* 2003; 19: 1572–1574. PMID: [12912839](https://pubmed.ncbi.nlm.nih.gov/12912839/)
47. Varon A, Vinh LS, Wheeler WC. POY version 4: phylogenetic analysis using dynamic homologies. *Cladistics.* 2010; 26: 72–85.
48. Stamatakis A. RAxML version 8: a tool for phylogenetic analysis and post-analysis of large phylogenies. *Bioinformatics.* 2014; 30: 1312–1313. doi: [10.1093/bioinformatics/btu033](https://doi.org/10.1093/bioinformatics/btu033) PMID: [24451623](https://pubmed.ncbi.nlm.nih.gov/24451623/)
49. Sorenson MD and Franzosa EA. TreeRot, version 3. Boston University, Boston, MA. 2007. Available: <http://people.bu.edu/msoren/TreeRot.html>
50. Thornhill DJ, Lajeunesse TC, Santos SR. Measuring rDNA diversity in eukaryotic microbial systems: how intragenomic variation, pseudogenes, and PCR artifacts confound biodiversity estimates. *Mol Ecol.* 2007; 16: 5326–5340. PMID: [17995924](https://pubmed.ncbi.nlm.nih.gov/17995924/)
51. Tindall KR, Kunkel TA. Fidelity of DNA synthesis by the *Thermus aquaticus* DNA polymerase. *Biochemistry.* 1988; 27: 6008–6013 PMID: [2847780](https://pubmed.ncbi.nlm.nih.gov/2847780/)
52. Vollmer SV, Palumbi SR. Testing the utility of internally transcribed spacer sequences in coral phylogenetics. *Mol Ecol.* 2004; 13: 2763–2772. PMID: [15315687](https://pubmed.ncbi.nlm.nih.gov/15315687/)
53. Veron JEN. *Corals of the World.* Australian Institute of Marine Science and CRR Qld Pty Ltd. Townsville, Australia; 2000.
54. Seehausen O. Hybridization and adaptive radiation. *Trends Ecol Evol.* 2004; 19: 198–207. PMID: [16701254](https://pubmed.ncbi.nlm.nih.gov/16701254/)
55. Van Oppen M, McDonald B, Willis B and Miller D. The evolutionary history of the coral genus *Acropora* (Scleractinia, Cnidaria) based on a mitochondrial and a nuclear marker: reticulation, incomplete lineage sorting, or morphological convergence? *Mol Biol Evol.* 2001; 18: 1315–1329. PMID: [11420370](https://pubmed.ncbi.nlm.nih.gov/11420370/)
56. Bayer FM. Octocorallia. In: Moore RC, editors. *Treatise on invertebrate paleontology, part F. Coelenterata.* Geological Society of America and University of Kansas Press, Lawrence; 1956. pp. 167–231.
57. Cairns S. *Guide to the Commoner Shallow-Water Gorgonians (Sea Whips, Sea Feathers, and Sea Fans) of Florida, The Gulf of Mexico, and the Caribbean Region.* University of Miami Sea Grant Program; 1977.
